# Supplementary material for: The prognostic value of NLRP1/NLRP3 and its relationship with immune infiltration in human gastric cancer
Source: publisher site journal article supplement (doi:10.18632/aging.204438), 2022-12-19
Supplement: Supplementary file [file aging-v14i24-204438-supplementary-material-SD2.pdf]

## SUPPLEMENTARY TABLE

Supplementary Table 1. Clinical information of 20 patients with gastric cancer.

| No. | Age | Gender | Clinical diagnosis    | Tumors size status | Histological grading degree of differentiation | Lymph node status | TNM staging |
|-----|-----|--------|-----------------------|--------------------|------------------------------------------------|-------------------|-------------|
| 1   | 56  | male   | Gastric antrum cancer | 5.5 × 4            | Poorly differentiated gastric adenocarcinoma   | 9/23              | T1N2M0      |
| 2   | 85  | male   | Gastric cancer        | 6 × 5              | Poorly differentiated gastric adenocarcinoma   | 24/25             | T3N3M0      |
| 3   | 72  | male   | Gastric cardia cancer | 2 × 3              | Poorly differentiated gastric adenocarcinoma   | 14/18             | T3N3M1      |
| 4   | 72  | male   | Gastric cardia cancer | 5 × 6              | Gastric neuroendocrine carcinoma               | 1/14              | T3N1M0      |
| 5   | 63  | male   | Gastric antrum cancer | 5 × 4              | Gastric neuroendocrine carcinoma               | 1/22              | T3N1M0      |
| 6   | 70  | male   | Gastric antrum cancer | 3 × 3              | Moderately-differentiated adenocarcinoma       | 7/20              | T3N3M0      |
| 7   | 76  | male   | Gastric antrum cancer | 7 × 4              | Poorly differentiated gastric adenocarcinoma   | 5/28              | T4N2M0      |
| 8   | 74  | male   | Gastric cardia cancer | 12 × 7             | Poorly differentiated gastric adenocarcinoma   | 6/22              | T3N2M0      |
| 9   | 63  | male   | Gastric cancer        | 4 × 3              | Poorly differentiated gastric adenocarcinoma   | 12/30             | T3N3M0      |
| 10  | 73  | female | Gastric cancer        | 7 × 5              | Moderately-differentiated adenocarcinoma       | 34/44             | T3N3M0      |
| 11  | 78  | male   | Gastric cardia cancer | 5 × 4              | Mucinous adenocarcinomas                       | 10/22             | T3N3M0      |
| 12  | 65  | male   | Gastric antrum cancer | 3 × 3              | Moderately-differentiated adenocarcinoma       | 1/25              | T3N1M0      |
| 13  | 64  | male   | Gastric antrum cancer | 4 × 4              | Moderately-differentiated adenocarcinoma       | 4/19              | T1N2M0      |
| 14  | 77  | male   | Gastric cardia cancer | 3 × 3              | Moderately-differentiated adenocarcinoma       | 1/26              | T3N1M0      |
| 15  | 75  | female | Gastric cancer        | 10 × 8             | Signet-ring cell carcinoma.                    | 5/10              | T3N2M0      |
| 16  | 69  | female | Gastric cancer        | 5 × 4              | Moderately-differentiated adenocarcinoma       | 4/16              | T2N2M0      |
| 17  | 65  | male   | Gastric antrum cancer | 3 × 3              | moderately-differentiated adenocarcinoma       | 9/9               | T3N3M0      |
| 18  | 72  | male   | Gastric antrum cancer | 4 × 3              | moderately-differentiated adenocarcinoma       | 3/26              | T1N2M0      |
| 20  | 62  | male   | Gastric cancer        | 3 × 3              | poorly differentiated gastric adenocarcinoma   | 3/33              | T3N2M0      |
| 21  | 71  | female | Gastric cancer        | 3 × 3              | moderately-differentiated adenocarcinoma       | 11/15             | T2N3M0      |
| 22  | 77  | male   | Gastric cardia cancer | 4 × 4              | Signet-ring cell carcinoma.                    | 5/24              | T3N3M0      |
| 23  | 73  | female | Gastric cancer        | 8 × 6              | Moderately-differentiated adenocarcinoma       | 16/28             | T3N3M0      |
