# Supplementary material for: The prognostic value of NLRP1/NLRP3 and its relationship with immune infiltration in human gastric cancer
Source: Aging (Albany NY). 2022 Dec 19;14(24):9980–10008. doi: 10.18632/aging.204438 (PMC9831740; doi:10.18632/aging.204438)
Supplement: Supplementary Table 2 [file aging-14-204438-s003.xlsx]

## Sheet: Sheet1
Supplementary Table 2. Original source data of NLRP1 in GSEA.
NAME	SIZE	ES	NES	NOM p-val	FDR q-val	FWER p-val	RANK AT MAX	LEADING EDGE
KEGG_NEUROTROPHIN_SIGNALING_PATHWAY	125	0.527924	2.28165	0	0.00869778	0.006	6707	tags=41%, list=25%, signal=54%
KEGG_VASCULAR_SMOOTH_MUSCLE_CONTRACTION	111	0.636471	2.25528	0	0.00605477	0.007	2862	tags=34%, list=11%, signal=38%
KEGG_CHEMOKINE_SIGNALING_PATHWAY	183	0.62293	2.25458	0	0.004367	0.008	4212	tags=42%, list=16%, signal=49%
KEGG_LEUKOCYTE_TRANSENDOTHELIAL_MIGRATION	115	0.594723	2.20428	0	0.00458999	0.012	3346	tags=36%, list=13%, signal=41%
KEGG_REGULATION_OF_ACTIN_CYTOSKELETON	209	0.515373	2.18427	0	0.00471135	0.016	3883	tags=31%, list=15%, signal=36%
KEGG_JAK_STAT_SIGNALING_PATHWAY	150	0.585131	2.15553	0.00202429	0.00612834	0.023	5661	tags=42%, list=21%, signal=53%
KEGG_DILATED_CARDIOMYOPATHY	90	0.657946	2.14775	0	0.00574152	0.024	3711	tags=41%, list=14%, signal=48%
KEGG_CALCIUM_SIGNALING_PATHWAY	177	0.596827	2.14759	0	0.00502383	0.024	4997	tags=43%, list=19%, signal=53%
KEGG_FOCAL_ADHESION	197	0.596913	2.13199	0.00201207	0.00551936	0.028	5514	tags=47%, list=21%, signal=59%
KEGG_ACUTE_MYELOID_LEUKEMIA	57	0.568208	2.12196	0	0.0054271	0.031	5256	tags=40%, list=20%, signal=50%
KEGG_CELL_ADHESION_MOLECULES_CAMS	125	0.682367	2.08875	0	0.00687381	0.041	5071	tags=62%, list=19%, signal=77%
KEGG_CYTOKINE_CYTOKINE_RECEPTOR_INTERACTION	254	0.616388	2.08395	0	0.00674739	0.045	4163	tags=42%, list=16%, signal=49%
KEGG_HEMATOPOIETIC_CELL_LINEAGE	84	0.724321	2.07332	0	0.00706066	0.053	4602	tags=63%, list=17%, signal=76%
KEGG_MAPK_SIGNALING_PATHWAY	264	0.458792	2.05895	0	0.00799917	0.063	5906	tags=33%, list=22%, signal=42%
KEGG_MELANOGENESIS	100	0.53289	2.04706	0	0.00801687	0.065	3753	tags=29%, list=14%, signal=34%
KEGG_FC_EPSILON_RI_SIGNALING_PATHWAY	78	0.537523	2.04614	0	0.00769929	0.065	5866	tags=38%, list=22%, signal=49%
KEGG_T_CELL_RECEPTOR_SIGNALING_PATHWAY	107	0.582999	2.04068	0	0.00741893	0.065	5866	tags=47%, list=22%, signal=60%
KEGG_ARRHYTHMOGENIC_RIGHT_VENTRICULAR_CARDIOMYOPATHY_ARVC	74	0.609956	2.03608	0	0.00729395	0.066	3711	tags=38%, list=14%, signal=44%
KEGG_B_CELL_RECEPTOR_SIGNALING_PATHWAY	75	0.605783	2.03438	0	0.00707445	0.068	5800	tags=47%, list=22%, signal=60%
KEGG_FC_GAMMA_R_MEDIATED_PHAGOCYTOSIS	91	0.535726	2.01873	0	0.00820109	0.078	4818	tags=36%, list=18%, signal=44%
KEGG_GAP_JUNCTION	88	0.525358	2.001	0	0.00952243	0.085	5514	tags=35%, list=21%, signal=44%
KEGG_VEGF_SIGNALING_PATHWAY	75	0.482373	1.99507	0	0.00965532	0.094	5066	tags=32%, list=19%, signal=39%
KEGG_HYPERTROPHIC_CARDIOMYOPATHY_HCM	83	0.605661	1.97737	0	0.0114069	0.109	4941	tags=41%, list=19%, signal=50%
KEGG_VIRAL_MYOCARDITIS	65	0.59967	1.93519	0.00207039	0.015583	0.144	4081	tags=46%, list=15%, signal=54%
KEGG_NATURAL_KILLER_CELL_MEDIATED_CYTOTOXICITY	127	0.555309	1.9344	0.00630252	0.0150759	0.144	5270	tags=39%, list=20%, signal=48%
KEGG_GLIOMA	65	0.517953	1.92852	0	0.0155393	0.154	5574	tags=34%, list=21%, signal=43%
KEGG_ECM_RECEPTOR_INTERACTION	84	0.65976	1.92139	0.00606061	0.0163248	0.168	5786	tags=63%, list=22%, signal=80%
KEGG_PATHWAYS_IN_CANCER	321	0.440182	1.92044	0.00202429	0.0159114	0.169	5749	tags=35%, list=22%, signal=44%
KEGG_APOPTOSIS	87	0.509188	1.89606	0.0040568	0.0181882	0.191	2954	tags=24%, list=11%, signal=27%
KEGG_TOLL_LIKE_RECEPTOR_SIGNALING_PATHWAY	100	0.533109	1.89367	0.00406504	0.0181202	0.197	6349	tags=39%, list=24%, signal=51%
KEGG_INSULIN_SIGNALING_PATHWAY	136	0.419021	1.89036	0.00809717	0.0183519	0.2	5795	tags=31%, list=22%, signal=39%
KEGG_RENAL_CELL_CARCINOMA	66	0.476894	1.88315	0.00618557	0.0191625	0.212	6579	tags=39%, list=25%, signal=52%
KEGG_GNRH_SIGNALING_PATHWAY	100	0.445876	1.87385	0.00198413	0.0200905	0.224	6342	tags=31%, list=24%, signal=41%
KEGG_LONG_TERM_POTENTIATION	70	0.474572	1.87123	0	0.0198835	0.227	5128	tags=27%, list=19%, signal=34%
KEGG_MELANOMA	71	0.516036	1.86193	0	0.0208012	0.237	5061	tags=35%, list=19%, signal=43%
KEGG_HEDGEHOG_SIGNALING_PATHWAY	56	0.553516	1.85637	0	0.0211421	0.245	3636	tags=29%, list=14%, signal=33%
KEGG_ADIPOCYTOKINE_SIGNALING_PATHWAY	67	0.463458	1.84266	0	0.0231707	0.268	7382	tags=45%, list=28%, signal=62%
KEGG_INTESTINAL_IMMUNE_NETWORK_FOR_IGA_PRODUCTION	43	0.756768	1.83685	0.00829876	0.023937	0.274	4006	tags=74%, list=15%, signal=88%
KEGG_ERBB_SIGNALING_PATHWAY	86	0.450841	1.83143	0.00584795	0.0243521	0.283	5987	tags=34%, list=23%, signal=43%
KEGG_MTOR_SIGNALING_PATHWAY	50	0.483973	1.8276	0.00403226	0.024992	0.291	5266	tags=34%, list=20%, signal=42%
KEGG_BASAL_CELL_CARCINOMA	55	0.574521	1.82606	0.00414079	0.0247291	0.295	3636	tags=35%, list=14%, signal=40%
KEGG_PHOSPHATIDYLINOSITOL_SIGNALING_SYSTEM	76	0.533407	1.81038	0.0117647	0.0275785	0.329	6024	tags=43%, list=23%, signal=56%
KEGG_SYSTEMIC_LUPUS_ERYTHEMATOSUS	51	0.686195	1.79884	0.0242915	0.0293268	0.342	5096	tags=69%, list=19%, signal=85%
KEGG_CHRONIC_MYELOID_LEUKEMIA	73	0.467657	1.79802	0.0116732	0.0288485	0.342	5498	tags=36%, list=21%, signal=45%
KEGG_AXON_GUIDANCE	127	0.480944	1.79767	0.00623701	0.0282928	0.342	6344	tags=45%, list=24%, signal=59%
KEGG_COLORECTAL_CANCER	62	0.485992	1.7923	0.00982318	0.0290919	0.356	3778	tags=27%, list=14%, signal=32%
KEGG_TGF_BETA_SIGNALING_PATHWAY	85	0.482986	1.78922	0.00823045	0.0292239	0.362	7221	tags=47%, list=27%, signal=64%
KEGG_PRIMARY_IMMUNODEFICIENCY	35	0.74468	1.78908	0.0145833	0.0286151	0.362	2601	tags=54%, list=10%, signal=60%
KEGG_NEUROACTIVE_LIGAND_RECEPTOR_INTERACTION	268	0.520954	1.78206	0	0.0299412	0.374	4546	tags=33%, list=17%, signal=39%
KEGG_NOD_LIKE_RECEPTOR_SIGNALING_PATHWAY	60	0.517946	1.77895	0.0183673	0.0301163	0.377	6921	tags=47%, list=26%, signal=63%
KEGG_ENDOCYTOSIS	173	0.384836	1.77028	0.0162272	0.0316681	0.394	4497	tags=25%, list=17%, signal=30%
KEGG_LEISHMANIA_INFECTION	68	0.599126	1.76725	0.0291667	0.0318877	0.403	6919	tags=62%, list=26%, signal=83%
KEGG_PROSTATE_CANCER	88	0.428484	1.76456	0.00195695	0.0319929	0.413	5514	tags=32%, list=21%, signal=40%
KEGG_PRION_DISEASES	35	0.554955	1.756	0.0102459	0.0331973	0.435	3179	tags=31%, list=12%, signal=36%
KEGG_AUTOIMMUNE_THYROID_DISEASE	47	0.690431	1.75287	0.0167364	0.0332735	0.44	3970	tags=47%, list=15%, signal=55%
KEGG_ALDOSTERONE_REGULATED_SODIUM_REABSORPTION	40	0.527582	1.74399	0.0119048	0.0348625	0.46	5400	tags=40%, list=20%, signal=50%
KEGG_COMPLEMENT_AND_COAGULATION_CASCADES	67	0.594591	1.74161	0.0138889	0.0348058	0.464	4333	tags=43%, list=16%, signal=52%
KEGG_WNT_SIGNALING_PATHWAY	150	0.410446	1.71361	0.00414938	0.0417939	0.524	3011	tags=19%, list=11%, signal=21%
KEGG_LONG_TERM_DEPRESSION	66	0.441417	1.71305	0.0078125	0.0412557	0.524	7206	tags=38%, list=27%, signal=52%
KEGG_ASTHMA	25	0.713461	1.70481	0.0386965	0.0433797	0.551	5866	tags=76%, list=22%, signal=97%
KEGG_TIGHT_JUNCTION	126	0.388793	1.69037	0.00621118	0.0471081	0.576	5893	tags=28%, list=22%, signal=36%
KEGG_ADHERENS_JUNCTION	68	0.437126	1.68918	0.0202429	0.0466525	0.578	5834	tags=37%, list=22%, signal=47%
KEGG_PATHOGENIC_ESCHERICHIA_COLI_INFECTION	55	0.374281	1.66107	0.0277778	0.0547778	0.636	3384	tags=18%, list=13%, signal=21%
KEGG_TYPE_II_DIABETES_MELLITUS	45	0.505479	1.6598	0.0193798	0.0543301	0.639	5866	tags=44%, list=22%, signal=57%
KEGG_GLYCOSPHINGOLIPID_BIOSYNTHESIS_GANGLIO_SERIES	15	0.660372	1.65091	0.0295359	0.056801	0.661	4396	tags=47%, list=17%, signal=56%
KEGG_NON_SMALL_CELL_LUNG_CANCER	54	0.441116	1.64402	0.0234375	0.0583347	0.674	3860	tags=22%, list=15%, signal=26%
KEGG_ENDOMETRIAL_CANCER	52	0.442799	1.63858	0.0254902	0.059766	0.687	5467	tags=29%, list=21%, signal=36%
KEGG_VASOPRESSIN_REGULATED_WATER_REABSORPTION	44	0.38578	1.62408	0.0346939	0.0644283	0.719	4492	tags=20%, list=17%, signal=25%
KEGG_DORSO_VENTRAL_AXIS_FORMATION	24	0.523498	1.61752	0.0246407	0.0660544	0.732	5916	tags=38%, list=22%, signal=48%
KEGG_GLYCOSAMINOGLYCAN_BIOSYNTHESIS_CHONDROITIN_SULFATE	22	0.615023	1.59905	0.0508475	0.071768	0.76	4891	tags=50%, list=18%, signal=61%
KEGG_INOSITOL_PHOSPHATE_METABOLISM	54	0.463969	1.59528	0.0462428	0.0722413	0.765	6024	tags=37%, list=23%, signal=48%
KEGG_PROGESTERONE_MEDIATED_OOCYTE_MATURATION	84	0.402607	1.58555	0.039604	0.0749737	0.781	3293	tags=24%, list=12%, signal=27%
KEGG_ALLOGRAFT_REJECTION	32	0.700031	1.58206	0.0770878	0.0756115	0.787	3970	tags=63%, list=15%, signal=73%
KEGG_SMALL_CELL_LUNG_CANCER	84	0.411806	1.5629	0.0459082	0.0826099	0.812	5458	tags=33%, list=21%, signal=42%
KEGG_TYPE_I_DIABETES_MELLITUS	37	0.620463	1.56258	0.0965665	0.0815623	0.812	3970	tags=51%, list=15%, signal=60%
KEGG_PANCREATIC_CANCER	69	0.401495	1.55632	0.0406504	0.0838638	0.818	5086	tags=28%, list=19%, signal=34%
KEGG_ARACHIDONIC_ACID_METABOLISM	56	0.469975	1.54218	0.0516529	0.0894178	0.838	3529	tags=25%, list=13%, signal=29%
KEGG_AMYOTROPHIC_LATERAL_SCLEROSIS_ALS	53	0.365063	1.51699	0.032	0.100134	0.862	5866	tags=32%, list=22%, signal=41%
KEGG_EPITHELIAL_CELL_SIGNALING_IN_HELICOBACTER_PYLORI_INFECTION	67	0.339566	1.5042	0.0589474	0.105437	0.872	2049	tags=12%, list=8%, signal=13%
KEGG_GRAFT_VERSUS_HOST_DISEASE	33	0.667668	1.49323	0.12527	0.109981	0.883	5071	tags=64%, list=19%, signal=79%
KEGG_NICOTINATE_AND_NICOTINAMIDE_METABOLISM	22	0.470279	1.47839	0.056	0.117043	0.899	5002	tags=32%, list=19%, signal=39%
KEGG_TASTE_TRANSDUCTION	51	0.496117	1.46286	0.0729783	0.123969	0.905	7341	tags=41%, list=28%, signal=57%
KEGG_ABC_TRANSPORTERS	44	0.441593	1.44445	0.0741445	0.133383	0.92	5908	tags=34%, list=22%, signal=44%
KEGG_RIG_I_LIKE_RECEPTOR_SIGNALING_PATHWAY	68	0.407791	1.43548	0.08	0.137124	0.927	8011	tags=35%, list=30%, signal=50%
KEGG_ANTIGEN_PROCESSING_AND_PRESENTATION	73	0.440579	1.34957	0.188679	0.195012	0.972	6159	tags=33%, list=23%, signal=43%
KEGG_GLYCOSAMINOGLYCAN_DEGRADATION	21	0.438521	1.34841	0.134921	0.193655	0.972	3709	tags=24%, list=14%, signal=28%
KEGG_NOTCH_SIGNALING_PATHWAY	47	0.353864	1.34299	0.160714	0.195955	0.977	6055	tags=32%, list=23%, signal=41%
KEGG_TRYPTOPHAN_METABOLISM	38	0.374264	1.33337	0.11	0.201089	0.978	5596	tags=26%, list=21%, signal=33%
KEGG_PURINE_METABOLISM	146	0.291243	1.33069	0.115942	0.200851	0.978	2968	tags=16%, list=11%, signal=18%
KEGG_RENIN_ANGIOTENSIN_SYSTEM	17	0.503444	1.32731	0.148515	0.201038	0.981	3489	tags=35%, list=13%, signal=41%
KEGG_SNARE_INTERACTIONS_IN_VESICULAR_TRANSPORT	38	0.318264	1.32176	0.161826	0.203241	0.983	3503	tags=16%, list=13%, signal=18%
KEGG_GLYCOSAMINOGLYCAN_BIOSYNTHESIS_HEPARAN_SULFATE	26	0.427287	1.30435	0.163107	0.214784	0.986	4522	tags=27%, list=17%, signal=32%
KEGG_BETA_ALANINE_METABOLISM	22	0.408205	1.25518	0.201646	0.252487	0.99	2376	tags=14%, list=9%, signal=15%
KEGG_TYROSINE_METABOLISM	40	0.356242	1.21985	0.184261	0.280094	0.993	1373	tags=15%, list=5%, signal=16%
KEGG_HISTIDINE_METABOLISM	27	0.373228	1.17168	0.241715	0.324833	0.997	1383	tags=11%, list=5%, signal=12%
KEGG_CARDIAC_MUSCLE_CONTRACTION	72	0.294564	1.16307	0.272	0.330338	0.998	2550	tags=14%, list=10%, signal=15%
KEGG_PRIMARY_BILE_ACID_BIOSYNTHESIS	16	0.433837	1.15368	0.307377	0.336478	0.999	6222	tags=38%, list=23%, signal=49%
KEGG_OOCYTE_MEIOSIS	110	0.253556	1.14846	0.284615	0.338137	0.999	2935	tags=14%, list=11%, signal=15%
KEGG_VIBRIO_CHOLERAE_INFECTION	53	0.259802	1.13648	0.310139	0.346598	0.999	1502	tags=8%, list=6%, signal=8%
KEGG_DRUG_METABOLISM_CYTOCHROME_P450	61	0.370262	1.12704	0.302913	0.352811	0.999	895	tags=10%, list=3%, signal=10%
KEGG_LYSOSOME	118	0.265289	1.08171	0.364185	0.39829	1	5539	tags=18%, list=21%, signal=22%
KEGG_PPAR_SIGNALING_PATHWAY	69	0.289639	1.03822	0.4	0.443514	1	5467	tags=26%, list=21%, signal=33%
KEGG_PHENYLALANINE_METABOLISM	17	0.338391	1.00007	0.437984	0.483983	1	895	tags=12%, list=3%, signal=12%
KEGG_ETHER_LIPID_METABOLISM	29	0.302751	0.99454	0.457732	0.486053	1	6667	tags=34%, list=25%, signal=46%
KEGG_CYTOSOLIC_DNA_SENSING_PATHWAY	54	0.298186	0.957957	0.515275	0.527543	1	6169	tags=24%, list=23%, signal=31%
KEGG_THYROID_CANCER	29	0.255309	0.945511	0.524436	0.538732	1	3671	tags=14%, list=14%, signal=16%
KEGG_METABOLISM_OF_XENOBIOTICS_BY_CYTOCHROME_P450	58	0.314922	0.943038	0.534654	0.537018	1	895	tags=7%, list=3%, signal=7%
KEGG_GLYCOSPHINGOLIPID_BIOSYNTHESIS_LACTO_AND_NEOLACTO_SERIES	25	0.288167	0.886142	0.592885	0.604934	1	5133	tags=24%, list=19%, signal=30%
KEGG_GLYCEROLIPID_METABOLISM	43	0.240102	0.850786	0.678776	0.64781	1	6516	tags=26%, list=25%, signal=34%
KEGG_ALPHA_LINOLENIC_ACID_METABOLISM	18	0.288748	0.825425	0.696466	0.675331	1	6667	tags=28%, list=25%, signal=37%
KEGG_STEROID_HORMONE_BIOSYNTHESIS	45	0.267885	0.821974	0.669941	0.673979	1	332	tags=7%, list=1%, signal=7%
KEGG_REGULATION_OF_AUTOPHAGY	33	0.275563	0.804423	0.661734	0.692531	1	6907	tags=21%, list=26%, signal=29%
KEGG_FATTY_ACID_METABOLISM	42	0.209471	0.689407	0.796078	0.836496	1	9514	tags=38%, list=36%, signal=59%
KEGG_UBIQUITIN_MEDIATED_PROTEOLYSIS	131	0.140547	0.62708	0.84252	0.89924	1	6287	tags=17%, list=24%, signal=22%
KEGG_STARCH_AND_SUCROSE_METABOLISM	43	0.17929	0.60259	0.973535	0.913471	1	11567	tags=56%, list=44%, signal=99%
KEGG_OLFACTORY_TRANSDUCTION	381	0.148575	0.358501	0.976048	0.997305	1	21964	tags=99%, list=83%, signal=566%
