# Supplementary material for: The prognostic value of NLRP1/NLRP3 and its relationship with immune infiltration in human gastric cancer
Source: Aging (Albany NY). 2022 Dec 19;14(24):9980–10008. doi: 10.18632/aging.204438 (PMC9831740; doi:10.18632/aging.204438)
Supplement: Supplementary Table 3 [file aging-14-204438-s004.xlsx]

## Sheet: Sheet1
Supplementary Table 3. Original source data of NLRP3 in GSEA.
NAME	SIZE	ES	NES	NOM p-val	FDR q-val	FWER p-val	RANK AT MAX	LEADING EDGE
KEGG_CHEMOKINE_SIGNALING_PATHWAY	183	0.683406	2.41447	0	0	0	4318	tags=48%, list=16%, signal=56%
KEGG_LEUKOCYTE_TRANSENDOTHELIAL_MIGRATION	115	0.651625	2.34084	0	0.00704374	0.009	4462	tags=42%, list=17%, signal=50%
KEGG_CYTOKINE_CYTOKINE_RECEPTOR_INTERACTION	254	0.691037	2.30843	0	0.00590489	0.011	4735	tags=57%, list=18%, signal=68%
KEGG_REGULATION_OF_ACTIN_CYTOSKELETON	209	0.549031	2.30383	0	0.00442867	0.011	4318	tags=32%, list=16%, signal=38%
KEGG_JAK_STAT_SIGNALING_PATHWAY	150	0.627955	2.29881	0	0.00459877	0.013	5997	tags=55%, list=23%, signal=70%
KEGG_FOCAL_ADHESION	197	0.630333	2.23932	0	0.00438013	0.015	4500	tags=45%, list=17%, signal=53%
KEGG_CELL_ADHESION_MOLECULES_CAMS	125	0.759407	2.2387	0	0.0037544	0.015	2948	tags=58%, list=11%, signal=64%
KEGG_FC_GAMMA_R_MEDIATED_PHAGOCYTOSIS	91	0.615948	2.22525	0	0.00360317	0.015	5043	tags=42%, list=19%, signal=51%
KEGG_FC_EPSILON_RI_SIGNALING_PATHWAY	78	0.595515	2.20629	0	0.00341494	0.016	4664	tags=38%, list=18%, signal=47%
KEGG_TOLL_LIKE_RECEPTOR_SIGNALING_PATHWAY	100	0.633803	2.19206	0	0.00393825	0.018	5807	tags=47%, list=22%, signal=60%
KEGG_NOD_LIKE_RECEPTOR_SIGNALING_PATHWAY	60	0.630772	2.17282	0	0.00374935	0.019	4491	tags=38%, list=17%, signal=46%
KEGG_NEUROTROPHIN_SIGNALING_PATHWAY	125	0.501069	2.1688	0	0.00354516	0.02	4432	tags=25%, list=17%, signal=30%
KEGG_VASCULAR_SMOOTH_MUSCLE_CONTRACTION	111	0.603772	2.15456	0	0.00348845	0.021	3522	tags=34%, list=13%, signal=39%
KEGG_T_CELL_RECEPTOR_SIGNALING_PATHWAY	107	0.633756	2.15289	0	0.00323928	0.021	4432	tags=44%, list=17%, signal=53%
KEGG_HEMATOPOIETIC_CELL_LINEAGE	84	0.774686	2.14383	0	0.00315938	0.022	3534	tags=68%, list=13%, signal=78%
KEGG_VIRAL_MYOCARDITIS	65	0.664369	2.13013	0	0.00368164	0.027	4274	tags=52%, list=16%, signal=62%
KEGG_LEISHMANIA_INFECTION	68	0.743763	2.12915	0	0.00346507	0.027	4212	tags=57%, list=16%, signal=68%
KEGG_CALCIUM_SIGNALING_PATHWAY	177	0.594747	2.12351	0	0.00327257	0.027	4432	tags=42%, list=17%, signal=50%
KEGG_ECM_RECEPTOR_INTERACTION	84	0.722227	2.11667	0	0.00328907	0.028	3992	tags=61%, list=15%, signal=71%
KEGG_PATHWAYS_IN_CANCER	321	0.486022	2.09829	0	0.00407289	0.037	4491	tags=31%, list=17%, signal=37%
KEGG_MAPK_SIGNALING_PATHWAY	264	0.471946	2.09406	0	0.00409736	0.038	5248	tags=30%, list=20%, signal=37%
KEGG_VEGF_SIGNALING_PATHWAY	75	0.509809	2.08241	0	0.00443235	0.043	4432	tags=31%, list=17%, signal=37%
KEGG_ACUTE_MYELOID_LEUKEMIA	57	0.57324	2.0693	0	0.00514532	0.052	4318	tags=35%, list=16%, signal=42%
KEGG_PRION_DISEASES	35	0.645008	2.05652	0	0.00560936	0.059	3867	tags=40%, list=15%, signal=47%
KEGG_NEUROACTIVE_LIGAND_RECEPTOR_INTERACTION	268	0.576411	2.03007	0	0.00687171	0.071	4908	tags=42%, list=18%, signal=51%
KEGG_DILATED_CARDIOMYOPATHY	90	0.63597	2.02878	0	0.00669208	0.071	3635	tags=41%, list=14%, signal=47%
KEGG_NATURAL_KILLER_CELL_MEDIATED_CYTOTOXICITY	127	0.593706	2.02048	0.00201613	0.00682269	0.075	5807	tags=52%, list=22%, signal=66%
KEGG_B_CELL_RECEPTOR_SIGNALING_PATHWAY	75	0.629616	2.01114	0	0.00730765	0.082	4318	tags=41%, list=16%, signal=49%
KEGG_RENAL_CELL_CARCINOMA	66	0.505826	2.00798	0.00388349	0.0073034	0.085	4376	tags=32%, list=16%, signal=38%
KEGG_INTESTINAL_IMMUNE_NETWORK_FOR_IGA_PRODUCTION	43	0.81386	1.99691	0.00198413	0.00778817	0.093	2767	tags=77%, list=10%, signal=86%
KEGG_TYPE_II_DIABETES_MELLITUS	45	0.593188	1.986	0	0.0080794	0.098	4318	tags=36%, list=16%, signal=42%
KEGG_HYPERTROPHIC_CARDIOMYOPATHY_HCM	83	0.603711	1.96269	0	0.0105129	0.127	3635	tags=37%, list=14%, signal=43%
KEGG_PATHOGENIC_ESCHERICHIA_COLI_INFECTION	55	0.452125	1.94019	0	0.0127072	0.156	1548	tags=13%, list=6%, signal=13%
KEGG_SYSTEMIC_LUPUS_ERYTHEMATOSUS	51	0.773761	1.93866	0.00206186	0.0124623	0.158	3465	tags=69%, list=13%, signal=79%
KEGG_ALDOSTERONE_REGULATED_SODIUM_REABSORPTION	40	0.580721	1.9303	0	0.0130873	0.167	5145	tags=45%, list=19%, signal=56%
KEGG_APOPTOSIS	87	0.524762	1.92906	0.0102881	0.0129632	0.168	4491	tags=32%, list=17%, signal=39%
KEGG_MELANOMA	71	0.539589	1.92831	0	0.0126956	0.168	3524	tags=30%, list=13%, signal=34%
KEGG_COLORECTAL_CANCER	62	0.530762	1.92815	0.00193798	0.0123615	0.168	3732	tags=29%, list=14%, signal=34%
KEGG_HEDGEHOG_SIGNALING_PATHWAY	56	0.569182	1.90948	0.002079	0.0140578	0.188	4356	tags=34%, list=16%, signal=41%
KEGG_GAP_JUNCTION	88	0.495807	1.90441	0.00199601	0.0143109	0.194	4153	tags=28%, list=16%, signal=34%
KEGG_MELANOGENESIS	100	0.486867	1.89786	0	0.0150057	0.205	4998	tags=33%, list=19%, signal=41%
KEGG_ADIPOCYTOKINE_SIGNALING_PATHWAY	67	0.486092	1.89359	0	0.0156358	0.215	7771	tags=48%, list=29%, signal=67%
KEGG_ASTHMA	25	0.797274	1.87959	0.0060241	0.0171101	0.232	3472	tags=76%, list=13%, signal=87%
KEGG_AXON_GUIDANCE	127	0.497488	1.86418	0	0.0194391	0.259	5283	tags=40%, list=20%, signal=50%
KEGG_COMPLEMENT_AND_COAGULATION_CASCADES	67	0.63994	1.86183	0	0.0194022	0.263	3764	tags=40%, list=14%, signal=47%
KEGG_TGF_BETA_SIGNALING_PATHWAY	85	0.502532	1.85186	0	0.0204995	0.278	3587	tags=31%, list=14%, signal=35%
KEGG_ARRHYTHMOGENIC_RIGHT_VENTRICULAR_CARDIOMYOPATHY_ARVC	74	0.578785	1.84594	0	0.0210326	0.29	3635	tags=38%, list=14%, signal=44%
KEGG_GLYCOSAMINOGLYCAN_BIOSYNTHESIS_CHONDROITIN_SULFATE	22	0.689805	1.83411	0.0147874	0.0229463	0.311	4291	tags=55%, list=16%, signal=65%
KEGG_ENDOCYTOSIS	173	0.3954	1.82424	0.0215264	0.0242752	0.328	4308	tags=25%, list=16%, signal=29%
KEGG_LYSOSOME	118	0.456203	1.82263	0.0309278	0.0240441	0.331	4671	tags=30%, list=18%, signal=36%
KEGG_AUTOIMMUNE_THYROID_DISEASE	47	0.708645	1.81864	0.00408163	0.0242472	0.339	5807	tags=72%, list=22%, signal=92%
KEGG_GRAFT_VERSUS_HOST_DISEASE	33	0.803219	1.81782	0.00796813	0.0239039	0.339	3869	tags=85%, list=15%, signal=99%
KEGG_TYPE_I_DIABETES_MELLITUS	37	0.731722	1.81522	0.0102249	0.0241804	0.347	4274	tags=73%, list=16%, signal=87%
KEGG_BASAL_CELL_CARCINOMA	55	0.566962	1.81239	0.00793651	0.0242149	0.352	3387	tags=35%, list=13%, signal=40%
KEGG_PRIMARY_IMMUNODEFICIENCY	35	0.765247	1.80897	0.00804829	0.0246183	0.359	2854	tags=57%, list=11%, signal=64%
KEGG_PROSTATE_CANCER	88	0.436457	1.80424	0.00996016	0.0248017	0.368	3588	tags=23%, list=14%, signal=26%
KEGG_MTOR_SIGNALING_PATHWAY	50	0.47997	1.80042	0.0102041	0.0250696	0.375	4376	tags=26%, list=16%, signal=31%
KEGG_ENDOMETRIAL_CANCER	52	0.482113	1.79298	0.011976	0.0261276	0.387	4318	tags=25%, list=16%, signal=30%
KEGG_ALLOGRAFT_REJECTION	32	0.800428	1.78289	0.0101215	0.0276729	0.4	4274	tags=84%, list=16%, signal=100%
KEGG_GLIOMA	65	0.474848	1.78273	0.00392927	0.027228	0.401	3235	tags=22%, list=12%, signal=24%
KEGG_GLYCOSPHINGOLIPID_BIOSYNTHESIS_GANGLIO_SERIES	15	0.707912	1.77696	0.0120968	0.0282261	0.412	3609	tags=47%, list=14%, signal=54%
KEGG_SMALL_CELL_LUNG_CANCER	84	0.467504	1.77687	0.0156863	0.0277931	0.413	4491	tags=30%, list=17%, signal=36%
KEGG_PANCREATIC_CANCER	69	0.459583	1.75615	0.012	0.031834	0.455	4376	tags=28%, list=16%, signal=33%
KEGG_ANTIGEN_PROCESSING_AND_PRESENTATION	73	0.575754	1.74489	0.0205761	0.0340605	0.47	7307	tags=63%, list=28%, signal=87%
KEGG_GNRH_SIGNALING_PATHWAY	100	0.41782	1.74129	0.0060241	0.0341869	0.474	3911	tags=20%, list=15%, signal=23%
KEGG_GLYCOSAMINOGLYCAN_DEGRADATION	21	0.563435	1.73901	0.0182186	0.03427	0.48	8085	tags=67%, list=30%, signal=96%
KEGG_ARACHIDONIC_ACID_METABOLISM	56	0.517646	1.72026	0.0124481	0.0385943	0.517	1949	tags=23%, list=7%, signal=25%
KEGG_INSULIN_SIGNALING_PATHWAY	136	0.381052	1.7108	0.00792079	0.0401579	0.533	4318	tags=21%, list=16%, signal=24%
KEGG_ERBB_SIGNALING_PATHWAY	86	0.42023	1.69774	0.0234375	0.0427671	0.564	5450	tags=29%, list=21%, signal=36%
KEGG_NICOTINATE_AND_NICOTINAMIDE_METABOLISM	22	0.543617	1.69671	0.0144628	0.0424384	0.567	2188	tags=23%, list=8%, signal=25%
KEGG_EPITHELIAL_CELL_SIGNALING_IN_HELICOBACTER_PYLORI_INFECTION	67	0.379451	1.68736	0.02	0.0444127	0.578	4671	tags=21%, list=18%, signal=25%
KEGG_ABC_TRANSPORTERS	44	0.523638	1.68384	0.00838574	0.044936	0.581	5826	tags=39%, list=22%, signal=49%
KEGG_CHRONIC_MYELOID_LEUKEMIA	73	0.43895	1.67038	0.0449219	0.0483533	0.61	4318	tags=27%, list=16%, signal=33%
KEGG_RIG_I_LIKE_RECEPTOR_SIGNALING_PATHWAY	68	0.464488	1.66851	0.0218254	0.0482001	0.615	7651	tags=46%, list=29%, signal=64%
KEGG_PHOSPHATIDYLINOSITOL_SIGNALING_SYSTEM	76	0.500006	1.66579	0.0254403	0.0484139	0.617	5154	tags=36%, list=19%, signal=44%
KEGG_GLYCOSAMINOGLYCAN_BIOSYNTHESIS_HEPARAN_SULFATE	26	0.535895	1.66529	0.00819672	0.0479519	0.618	3203	tags=27%, list=12%, signal=31%
KEGG_WNT_SIGNALING_PATHWAY	150	0.397236	1.66285	0.0182556	0.0480616	0.623	2913	tags=19%, list=11%, signal=21%
KEGG_NON_SMALL_CELL_LUNG_CANCER	54	0.450751	1.65727	0.0318091	0.0493217	0.632	4432	tags=24%, list=17%, signal=29%
KEGG_LONG_TERM_DEPRESSION	66	0.429314	1.63844	0.0182556	0.0547135	0.669	4315	tags=24%, list=16%, signal=29%
KEGG_LONG_TERM_POTENTIATION	70	0.405323	1.62573	0.0137525	0.0581736	0.691	5434	tags=27%, list=20%, signal=34%
KEGG_ADHERENS_JUNCTION	68	0.404767	1.56657	0.0684932	0.0797353	0.772	5857	tags=35%, list=22%, signal=45%
KEGG_PROGESTERONE_MEDIATED_OOCYTE_MATURATION	84	0.392519	1.52092	0.0629921	0.100556	0.845	3221	tags=23%, list=12%, signal=26%
KEGG_RENIN_ANGIOTENSIN_SYSTEM	17	0.580585	1.51614	0.0492126	0.101571	0.854	5229	tags=59%, list=20%, signal=73%
KEGG_TIGHT_JUNCTION	126	0.342035	1.4947	0.0378486	0.111476	0.877	4153	tags=20%, list=16%, signal=23%
KEGG_NOTCH_SIGNALING_PATHWAY	47	0.40948	1.49306	0.0846457	0.111063	0.88	3727	tags=23%, list=14%, signal=27%
KEGG_TRYPTOPHAN_METABOLISM	38	0.405187	1.45371	0.0634921	0.1328	0.922	4694	tags=29%, list=18%, signal=35%
KEGG_INOSITOL_PHOSPHATE_METABOLISM	54	0.428313	1.44622	0.0871287	0.136006	0.928	4719	tags=28%, list=18%, signal=34%
KEGG_VASOPRESSIN_REGULATED_WATER_REABSORPTION	44	0.328536	1.41855	0.103922	0.152074	0.948	4336	tags=18%, list=16%, signal=22%
KEGG_DORSO_VENTRAL_AXIS_FORMATION	24	0.451799	1.38888	0.11	0.169326	0.961	5811	tags=38%, list=22%, signal=48%
KEGG_AMYOTROPHIC_LATERAL_SCLEROSIS_ALS	53	0.336957	1.38076	0.078	0.173608	0.966	5324	tags=28%, list=20%, signal=35%
KEGG_PRIMARY_BILE_ACID_BIOSYNTHESIS	16	0.488034	1.33	0.133858	0.210267	0.983	7047	tags=44%, list=27%, signal=60%
KEGG_PURINE_METABOLISM	146	0.284456	1.32872	0.106996	0.209202	0.983	2422	tags=15%, list=9%, signal=16%
KEGG_CYTOSOLIC_DNA_SENSING_PATHWAY	54	0.40138	1.29875	0.16318	0.231493	0.987	7161	tags=46%, list=27%, signal=63%
KEGG_TYROSINE_METABOLISM	40	0.357841	1.26409	0.14898	0.259531	0.988	5204	tags=30%, list=20%, signal=37%
KEGG_ETHER_LIPID_METABOLISM	29	0.37165	1.22825	0.186	0.29172	0.991	651	tags=10%, list=2%, signal=11%
KEGG_SNARE_INTERACTIONS_IN_VESICULAR_TRANSPORT	38	0.290569	1.20884	0.239686	0.308192	0.994	3531	tags=13%, list=13%, signal=15%
KEGG_PHENYLALANINE_METABOLISM	17	0.398484	1.20605	0.222222	0.307558	0.995	2584	tags=18%, list=10%, signal=20%
KEGG_OLFACTORY_TRANSDUCTION	381	0.491149	1.18792	0.346856	0.323491	0.996	10905	tags=76%, list=41%, signal=127%
KEGG_PPAR_SIGNALING_PATHWAY	69	0.333742	1.16746	0.279919	0.341587	0.997	5617	tags=30%, list=21%, signal=39%
KEGG_TASTE_TRANSDUCTION	51	0.386992	1.15044	0.296371	0.355956	0.997	7916	tags=33%, list=30%, signal=47%
KEGG_PANTOTHENATE_AND_COA_BIOSYNTHESIS	16	0.392779	1.13151	0.314563	0.373167	0.997	3102	tags=25%, list=12%, signal=28%
KEGG_BETA_ALANINE_METABOLISM	22	0.360415	1.12767	0.301961	0.373847	0.997	5287	tags=23%, list=20%, signal=28%
KEGG_REGULATION_OF_AUTOPHAGY	33	0.383967	1.12127	0.343496	0.377136	0.997	7161	tags=48%, list=27%, signal=66%
KEGG_HISTIDINE_METABOLISM	27	0.350951	1.10441	0.301031	0.391975	0.998	4694	tags=22%, list=18%, signal=27%
KEGG_CARDIAC_MUSCLE_CONTRACTION	72	0.277655	1.09475	0.319192	0.399448	0.998	5658	tags=28%, list=21%, signal=35%
KEGG_VIBRIO_CHOLERAE_INFECTION	53	0.242894	1.08105	0.325052	0.410805	0.998	4998	tags=15%, list=19%, signal=19%
KEGG_ALPHA_LINOLENIC_ACID_METABOLISM	18	0.362491	1.06039	0.365112	0.431198	0.999	3911	tags=22%, list=15%, signal=26%
KEGG_BLADDER_CANCER	40	0.285946	0.996161	0.460285	0.506641	0.999	4376	tags=20%, list=16%, signal=24%
KEGG_GLYCOSPHINGOLIPID_BIOSYNTHESIS_LACTO_AND_NEOLACTO_SERIES	25	0.319162	0.991799	0.445434	0.507808	0.999	3098	tags=16%, list=12%, signal=18%
KEGG_AMINO_SUGAR_AND_NUCLEOTIDE_SUGAR_METABOLISM	41	0.272688	0.929673	0.52834	0.584964	0.999	3509	tags=17%, list=13%, signal=20%
KEGG_GALACTOSE_METABOLISM	26	0.288891	0.914041	0.572895	0.602307	1	2603	tags=12%, list=10%, signal=13%
KEGG_STEROID_HORMONE_BIOSYNTHESIS	45	0.286889	0.907415	0.604938	0.606463	1	342	tags=7%, list=1%, signal=7%
KEGG_THYROID_CANCER	29	0.233481	0.846376	0.644531	0.68679	1	3875	tags=14%, list=15%, signal=16%
KEGG_GLYCINE_SERINE_AND_THREONINE_METABOLISM	31	0.279997	0.842098	0.693204	0.686836	1	1851	tags=13%, list=7%, signal=14%
KEGG_DRUG_METABOLISM_CYTOCHROME_P450	61	0.258301	0.795534	0.708678	0.746363	1	1844	tags=10%, list=7%, signal=11%
KEGG_GLYCEROLIPID_METABOLISM	43	0.217771	0.760151	0.814103	0.790948	1	3159	tags=12%, list=12%, signal=13%
KEGG_STARCH_AND_SUCROSE_METABOLISM	43	0.223584	0.739952	0.813278	0.812378	1	9936	tags=37%, list=37%, signal=59%
KEGG_SPHINGOLIPID_METABOLISM	36	0.222879	0.724372	0.795833	0.82553	1	4588	tags=19%, list=17%, signal=23%
KEGG_METABOLISM_OF_XENOBIOTICS_BY_CYTOCHROME_P450	58	0.226546	0.693103	0.823171	0.857876	1	1507	tags=7%, list=6%, signal=7%
KEGG_GLYCOLYSIS_GLUCONEOGENESIS	61	0.185714	0.692303	0.864865	0.85169	1	1127	tags=5%, list=4%, signal=5%
KEGG_OTHER_GLYCAN_DEGRADATION	16	0.23096	0.683654	0.824324	0.85553	1	7176	tags=31%, list=27%, signal=43%
KEGG_PROXIMAL_TUBULE_BICARBONATE_RECLAMATION	21	0.197105	0.636294	0.921649	0.901107	1	3678	tags=14%, list=14%, signal=17%
KEGG_O_GLYCAN_BIOSYNTHESIS	26	0.220164	0.634418	0.8875	0.895727	1	3690	tags=15%, list=14%, signal=18%
KEGG_RETINOL_METABOLISM	53	0.188445	0.582836	0.973631	0.936167	1	8801	tags=36%, list=33%, signal=54%
KEGG_FATTY_ACID_METABOLISM	42	0.156058	0.513351	0.971545	0.969796	1	7363	tags=26%, list=28%, signal=36%
KEGG_PORPHYRIN_AND_CHLOROPHYLL_METABOLISM	32	0.147604	0.460288	0.995992	0.98164	1	3211	tags=9%, list=12%, signal=11%
